# Supplementary material
Source: publisher figshare collection journal article supplement (https://frontiersin.figshare.com/ndownloader/files/27669696)
Supplement: Supplementary file [file 27669696]

# **MNK 19**

*P4*

Samlet sekventering: ex 8 - ex 9 - ex 11

Primer 8U: **ex8** - ex9 - **ex11**

Score = 462 bits (240), Expect = 1e-126  
Identities = 258/262 (98%), Gaps = 2/262 (0%)  
Strand=Plus/Plus

|       |      |                                                                     |      |
|-------|------|---------------------------------------------------------------------|------|
| Query | 6    | <b>AGCAGGTCACCTTAGATCATAA-CGAGAA-TAAGACA</b> ATGGAGACGGTCTTTTCTTGAG | 63   |
|       |      |                                                                     |      |
| Sbjct | 2056 | <b>AGCAAGTCACCTTAGATCATAAACGAGAAATAAGACA</b> ATGGAGACGGTCTTTTCTTGAG | 2115 |
| Query | 64   | TCTGTTTTCTGTATTCCTGTAATGGGGCTGATGATATATATGATGGTTATGGACCACCA         | 123  |
|       |      |                                                                     |      |
| Sbjct | 2116 | TCTGTTTTCTGTATTCCTGTAATGGGGCTGATGACATATATGATGGTTATGGACCACCA         | 2175 |
| Query | 124  | CTTTGCAACTCTTCACCATAATCAAAACATGAGTAAAGAAGAAATGATCAACCTTCATTC        | 183  |
|       |      |                                                                     |      |
| Sbjct | 2176 | CTTTGCAACTCTTCACCATAATCAAAACATGAGTAAAGAAGAAATGATCAACCTTCATTC        | 2235 |
| Query | 184  | TTCTATGTTCTGAGCGCCAGATTCTTCAGGATTGCTCTGTTATGAATTTGCTGTCCTT          | 243  |
|       |      |                                                                     |      |
| Sbjct | 2236 | TTCTATGTTCTGAGCGCCAGATTCTTCAGGATTGCTCTGTTATGAATTTGCTGTCCTT          | 2295 |
| Query | 244  | TTTATTGTGTGTACCTGTACAG                                              | 265  |
|       |      |                                                                     |      |
| Sbjct | 2296 | TTTATTGTGTGTACCTGTACAG                                              | 2317 |

Score = 302 bits (157), Expect = 2e-78  
Identities = 157/157 (100%), Gaps = 0/157 (0%)  
Strand=Plus/Plus

|       |      |                                                                      |      |
|-------|------|----------------------------------------------------------------------|------|
| Query | 264  | <b>AGGGCAAAACATCAGAGGCTCTTGCAAAGTTAATTTCACTACAAGCTACAGAAGCAACTA</b>  | 323  |
|       |      |                                                                      |      |
| Sbjct | 2550 | <b>AGGGCAAAACATCAGAGGCTCTTGCAAAGTTAATTTCACTACAAGCTACAGAAGCAACTA</b>  | 2609 |
| Query | 324  | <b>TTGTAACCTCTTGATTCTGATAATATCCTCCTCAGTGAAGAACAAGTGGATGTGGAACCTG</b> | 383  |
|       |      |                                                                      |      |
| Sbjct | 2610 | <b>TTGTAACCTCTTGATTCTGATAATATCCTCCTCAGTGAAGAACAAGTGGATGTGGAACCTG</b> | 2669 |
| Query | 384  | <b>TACAACGTGGAGATATCATTAAAGTAGTTCCAGGAGG</b>                         | 420  |
|       |      |                                                                      |      |
| Sbjct | 2670 | <b>TACAACGTGGAGATATCATTAAAGTAGTTCCAGGAGG</b>                         | 2706 |

## Primer 12L: ex12 – ex11 – ex9 – ex 8

Score = 227 bits (118), Expect = 4e-56  
Identities = 118/118 (100%), Gaps = 0/118 (0%)  
Strand=Plus/Minus

```
Query 18    AGTTCCACATCCACTTGTTCCTTCACTGAGGAGGATATTATCAGAATCAAGAGTTACAATA 77
            |||
Sbjct 2667  AGTTCCACATCCACTTGTTCCTTCACTGAGGAGGATATTATCAGAATCAAGAGTTACAATA 2608
            |||

Query 78    GTTGCTTCTGTAGCTTGTAGTGAAATTAACTTTGCAAGAGCCTCTGATGTTTGGCCCT 135
            |||
Sbjct 2607  GTTGCTTCTGTAGCTTGTAGTGAAATTAACTTTGCAAGAGCCTCTGATGTTTGGCCCT 2550
            |||
```

Score = 554 bits (288), Expect = 2e-154  
Identities = 292/294 (99%), Gaps = 0/294 (0%)  
Strand=Plus/Minus

```
Query 134    CTGTACAGGTACACACAATAAAAAGGACAGCAAATTCATAACAGACAATCCTGGAAGAAT 193
            |||
Sbjct 2317  CTGTACAGGTACACACAATAAAAAGGACAGCAAATTCATAACAGACAATCCTGGAAGAAT 2258
            |||

Query 194    CTGGCGCTCCAGGAACATAGAAGAATGAAGGTTGATCATTTCTTCTTTACTCATGTTTTG 253
            |||
Sbjct 2257  CTGGCGCTCCAGGAACATAGAAGAATGAAGGTTGATCATTTCTTCTTTACTCATGTTTTG 2198
            |||

Query 254    ATTATGGTGAAGAGTTGCAAAGTGGTGGTCCATAACCATCATATATATCATCAGCCCCAT 313
            |||
Sbjct 2197  ATTATGGTGAAGAGTTGCAAAGTGGTGGTCCATAACCATCATATATATCATCAGCCCCAT 2138
            |||

Query 314    TACAGGAATACAGAAAAACAGACTCACAAGAAAAGACCGTCTCCATTGTCTTATTTCTCG 373
            |||
Sbjct 2137  TACAGGAATACAGAAAAACAGACTCACAAGAAAAGACCGTCTCCATTGTCTTATTTCTCG 2078
            |||

Query 374    TTTATGATCTAAGTGACTTGCTGACCGATCCTTCTTGACCAAAGAAGTTTCAAA 427
            |||
Sbjct 2077  TTTATGATCTAAGTGACTTGCTGACCGATCCTTCTTGACCAAAGAAGCTTCAAA 2024
            |||
```
